# Supplementary material
Source: Elsevier journal article supplement (https://www.sciencedirect.com/science/article/pii/S1413867019301333)
Supplement: mmc1 [file S1413867019301333:mmc1.docx]

| **Characteristic** | **Registered (n=456)** | | **Not registered (n=59)** | | ***p*** |
| --- | --- | --- | --- | --- | --- |
| **no** | **%** | **no** | **%** |
| **Gender** |  |  |  |  | **0.448** |
| Male | 105 | 23.0 | 11 | 18.6 |  |
| Female | 351 | 77.0 | 48 | 81.4 |  |
| **Age (years)** |  |  |  |  | **>0.999** |
| ≥ 35 | 223 | 48.9 | 2 | 50.0 |  |
| < 35 | 229 | 50.2 | 2 | 50.0 |  |
| **Occupation** |  |  |  |  | **0.383** |
| Nurse | 219 | 49.9 | 33 | 55.9 |  |
| Physician | 220 | 50.1 | 26 | 44.1 |  |
| **Working place** |  |  |  |  | **0.847** |
| Neonatology | 110 | 24.1 | 16 | 27.1 |  |
| Obstetrics | 193 | 42.3 | 23 | 39.0 |  |
| Anesthesiology | 153 | 33.6 | 20 | 33.9 |  |

**Supplementary appendix 1:** Characteristics of healthcare workers who were registered or not in the Immunization Center Data System. Instituto Central, Hospital das Clinicas – ICHC, Sao Paulo, Brazil, 2015-2016.
